# Supplementary material
Source: PubMed Central journal article supplement (PMC8326541)

# Supplementary Figure 2

## A. HIVNAT209V1 - Days without ARV

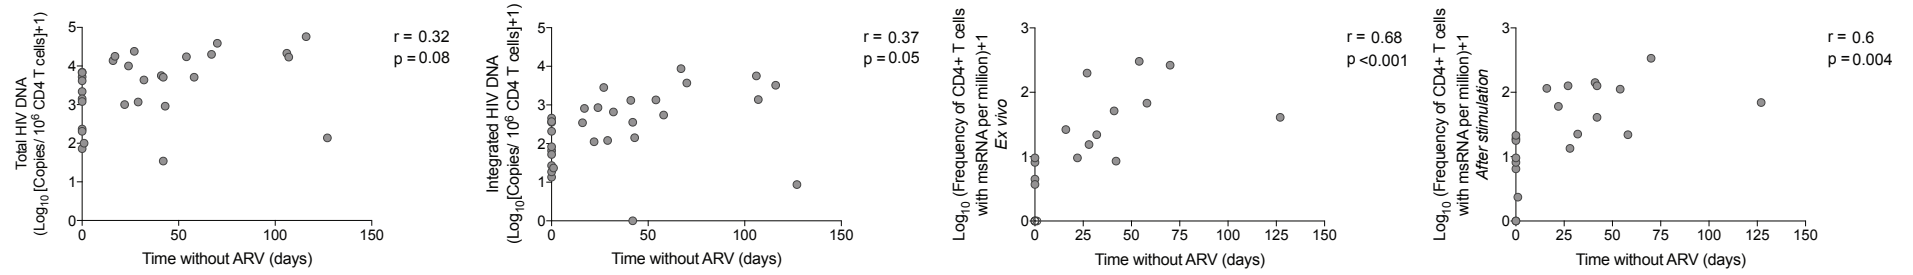

## B. HIVNAT209V1 - % of time without ARV

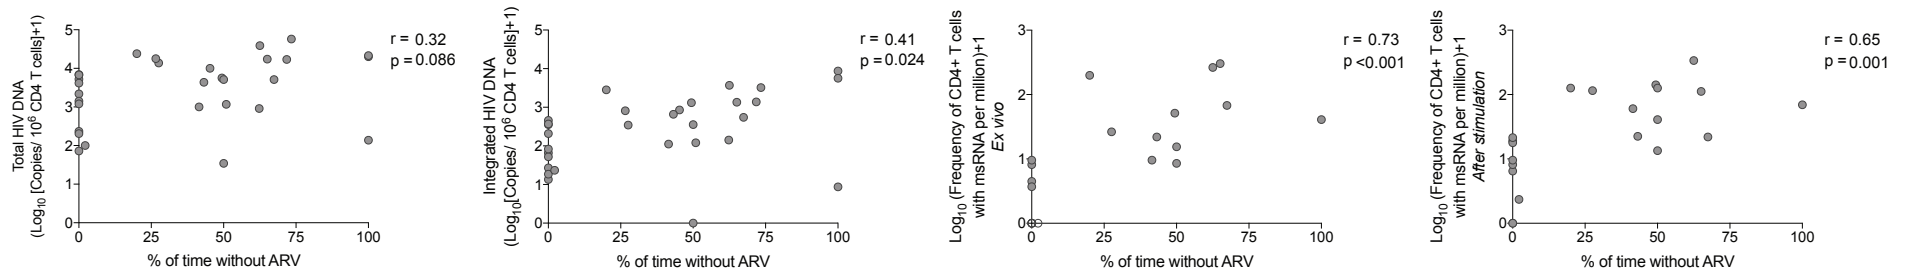

# Supplementary Figure 3

A.

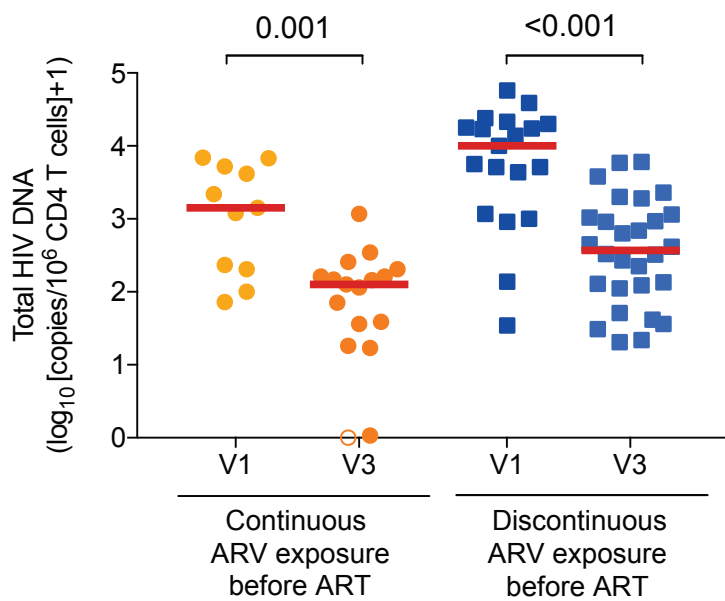

B.

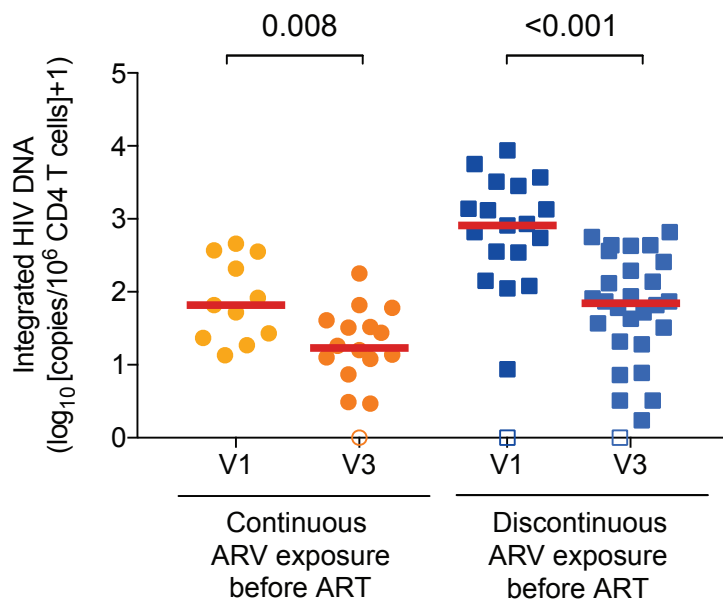

C.

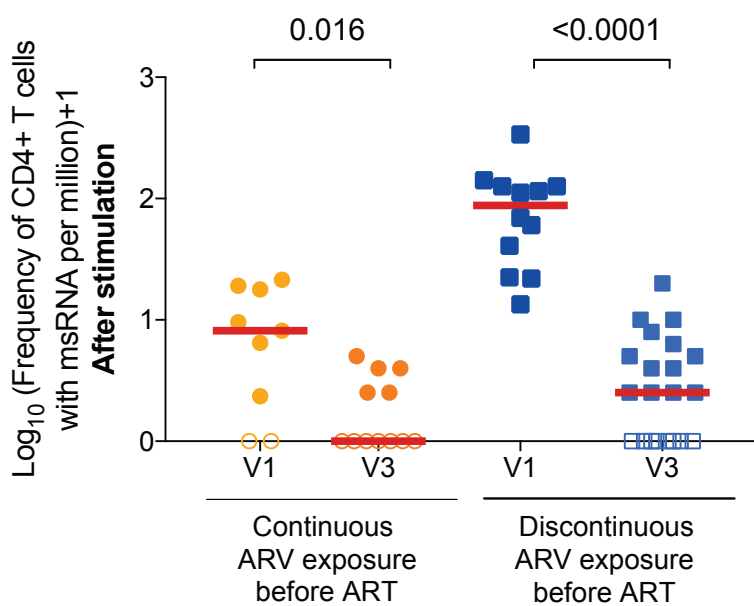

# Supplementary Figure 4

## A. HIVNAT209V3 - Days without ARV

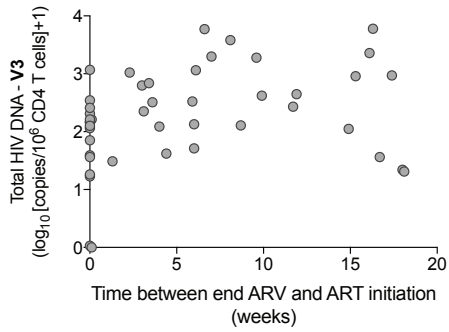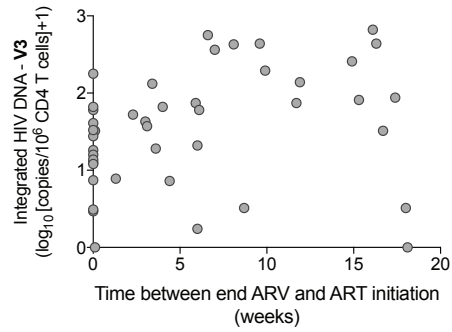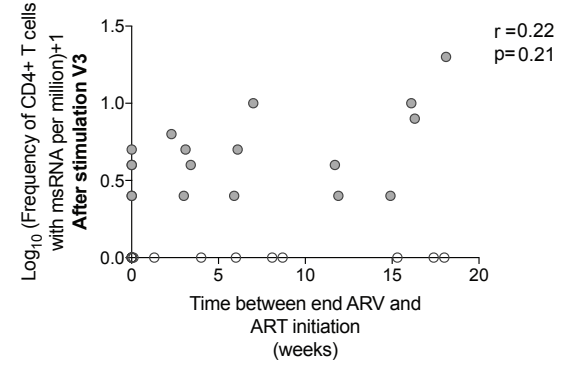

## B. HIVNAT209V3 - % of time without ARV

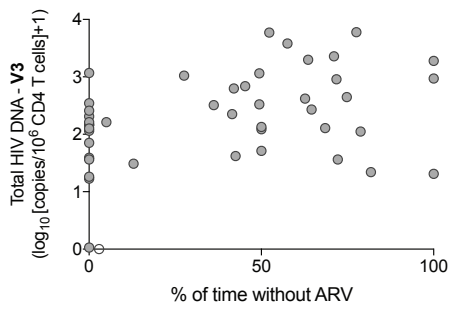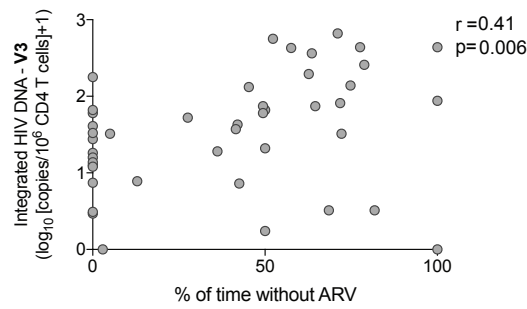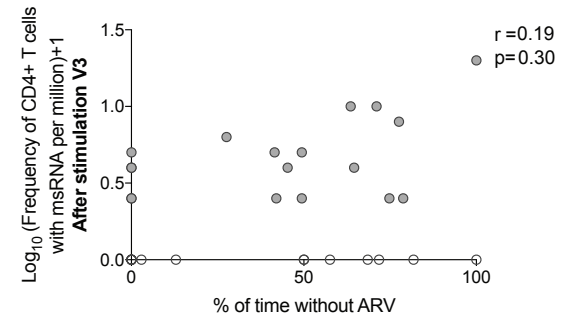

## C. HIVNAT209V3 - Age of ART initiation

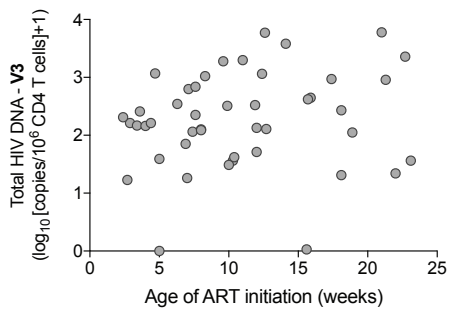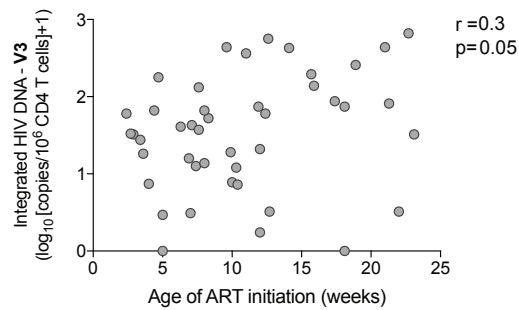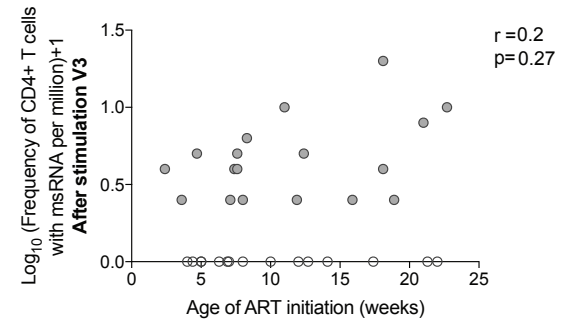

# Supplementary Figure 5

## A. HIVNAT194 - Time without ARV

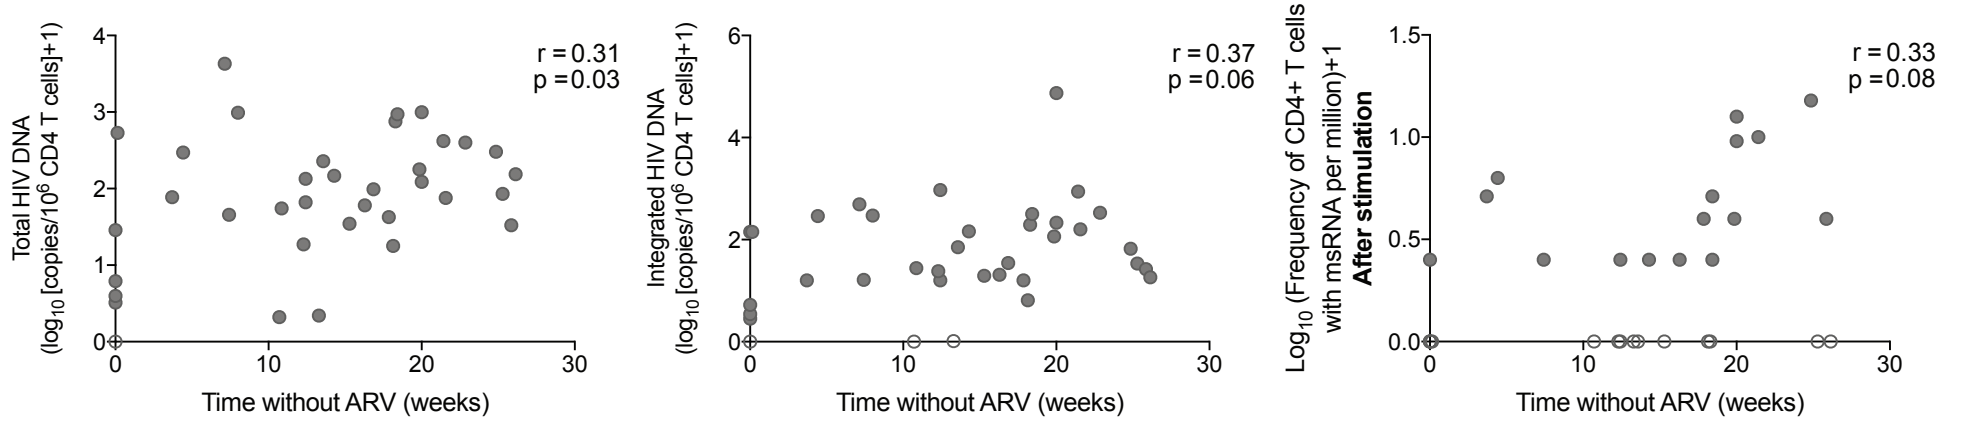

## B. HIVNAT194 - Age of ART initiation

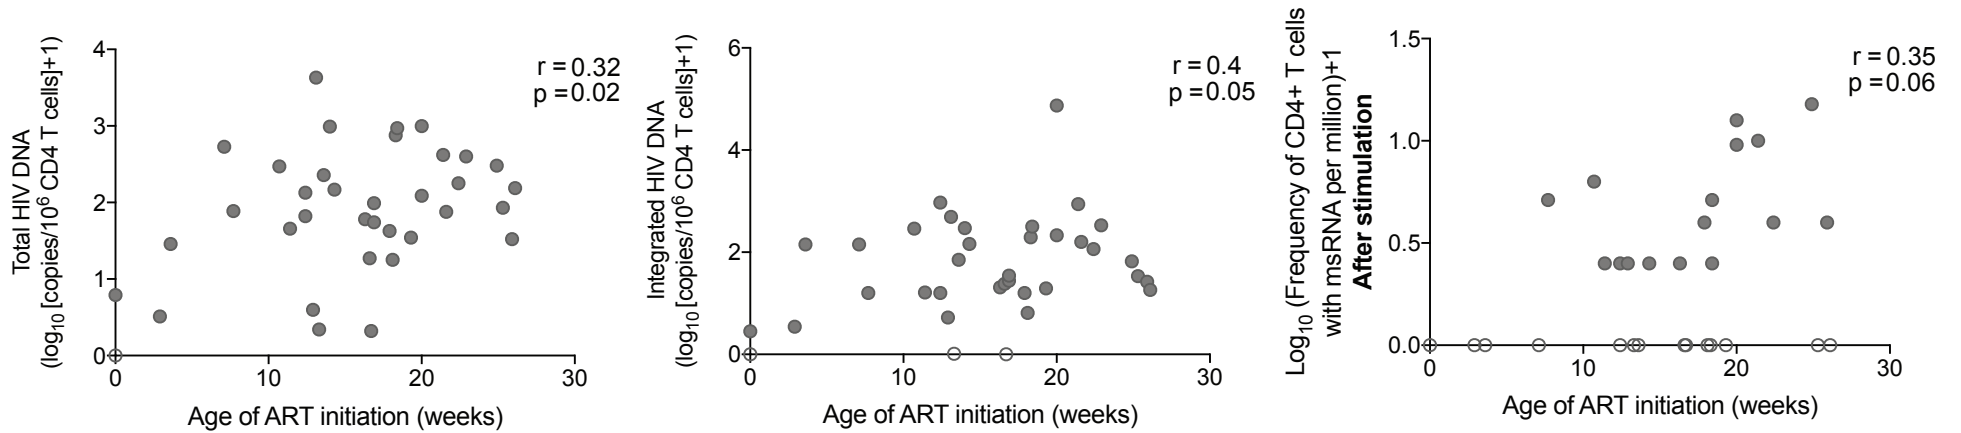

Supplement: ciaa718_suppl_supplementary_figures.pdf [file ciaa718_suppl_supplementary_figures.pdf]
